# Supplementary material for: A CdTe–MPA quantum dot fluorescence enhancement flow method for chlorhexidine determination
Source: Royal Society of Chemistry journal article supplement (doi:10.1039/c4ay00540f), 2014-01-01
Supplement: c4ay00540f1.pdf [file c4ay00540f1.pdf]

Electronic Supplementary Information

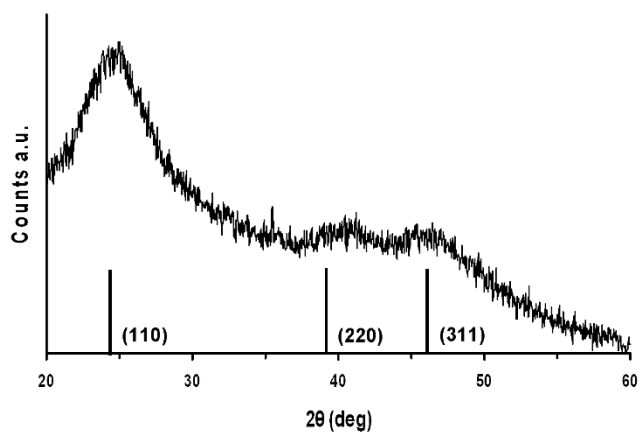

Figure S1. p-XRD of 3.1 nm CdTe-MPA QDs.

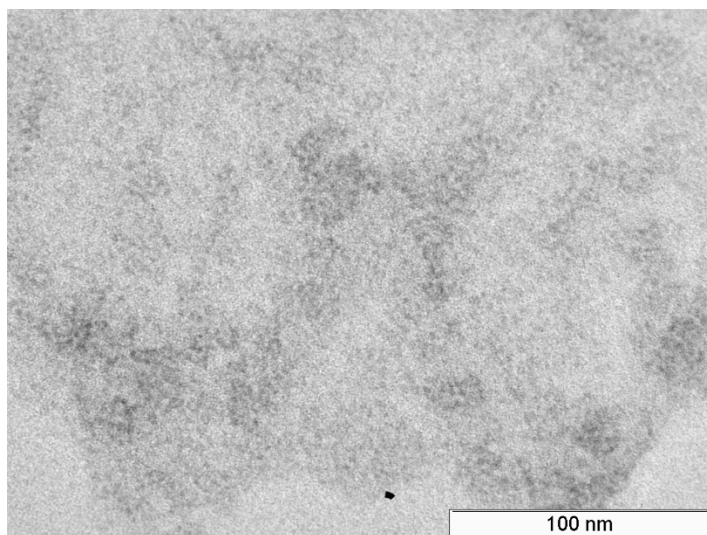

Figure S2. TEM of 3.1 nm CdTe-MPA QDs.

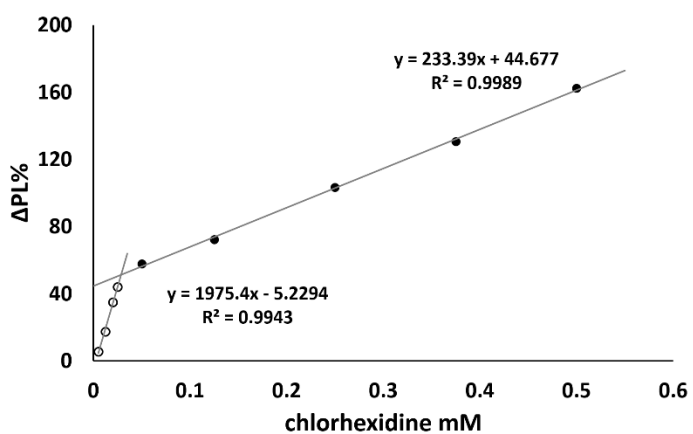

Figure S3. Regression curves for equations 4 and 5
